# Supplementary material for: Linear chain aluminium(iii) carboxymethylphosphonate with encapsulated ammonium ions
Source: Royal Society of Chemistry journal article supplement (doi:10.1039/c1dt11620g), 2011-01-01
Supplement: c1dt11620g.pdf [file c1dt11620g.pdf]

Table S1. Crystal data and structure refinement for  $(\text{NH}_4)_2\text{Al}(\text{H}_{1/2}\text{O}_3\text{PCH}_2\text{CO}_2)_2$  (CCDC 842302)

|                                      |                                                                          |
|--------------------------------------|--------------------------------------------------------------------------|
| Empirical formula                    | $\text{C}_4 \text{H}_{13} \text{Al} \text{N}_2 \text{O}_{10} \text{P}_2$ |
| Formula weight                       | 338.08                                                                   |
| Temperature                          | 110(2) K                                                                 |
| Wavelength                           | 0.71073 Å                                                                |
| Crystal system                       | Triclinic                                                                |
| Space group                          | P(-1)                                                                    |
| $a$ (Å)                              | 4.757(2)                                                                 |
| $b$ (Å)                              | 8.231(4)                                                                 |
| $c$ (Å)                              | 8.524(4)                                                                 |
| $\alpha$ (°)                         | 61.184(4)                                                                |
| $\beta$ (°)                          | 79.059(5)                                                                |
| $\gamma$ (°)                         | 85.228(5)                                                                |
| Volume                               | 287.2(2) Å <sup>3</sup>                                                  |
| $Z$                                  | 2                                                                        |
| $\rho_{\text{calc}}$                 | 1.955 Mg/m <sup>3</sup>                                                  |
| $\mu$                                | 0.511 mm <sup>-1</sup>                                                   |
| $F(000)$                             | 174                                                                      |
| Crystal size                         | 0.22 x 0.15 x 0.05 mm <sup>3</sup>                                       |
| Index ranges                         | -6 ≤ $h$ ≤ 6, -10 ≤ $k$ ≤ 10,<br>-10 ≤ $l$ ≤ 10                          |
| Reflections collected                | 3192                                                                     |
| Independent reflections              | 1235 [R(int) = 0.0170]                                                   |
| Refinement method                    | Full-matrix least-squares on $F^2$                                       |
| Data / restraints / parameters       | 1235 / 0 / 105                                                           |
| Goodness-of-fit on $F^2$             | 1.086                                                                    |
| Final R indices [ $I > 2\sigma(I)$ ] | R1 = 0.0248,<br>wR2 = 0.0687                                             |
| R indices (all data)                 | R1 = 0.0271,<br>wR2 = 0.0702                                             |
| Largest diff. peak and hole          | 0.378 and -0.395 e.Å <sup>-3</sup>                                       |

Table S2. Bond lengths [Å] and angles [°] for  $(\text{NH}_4)_2\text{Al}(\text{H}_{1/2}\text{O}_3\text{PCH}_2\text{CO}_2)_2$

|              |            |                     |          |
|--------------|------------|---------------------|----------|
| Al(1)-O(3)#1 | 1.8650(12) | O(3)#1-Al(1)-O(5)#1 | 93.82(5) |
| Al(1)-O(3)   | 1.8650(12) | O(3)-Al(1)-O(5)#1   | 86.18(5) |
| Al(1)-O(1)#2 | 1.8834(13) | O(1)#2-Al(1)-O(5)#1 | 91.10(5) |
| Al(1)-O(1)#3 | 1.8834(13) | O(1)#3-Al(1)-O(5)#1 | 88.90(5) |

|                     |            |                   |            |
|---------------------|------------|-------------------|------------|
| Al(1)-O(5)          | 1.9301(14) | O(5)-Al(1)-O(5)#1 | 180.00(1)  |
| Al(1)-O(5)#1        | 1.9301(14) | O(1)-P(1)-O(3)    | 113.76(6)  |
| O(1)-Al(1)#4        | 1.8834(13) | O(1)-P(1)-O(2)    | 110.16(6)  |
| P(1)-O(1)           | 1.5172(13) | O(3)-P(1)-O(2)    | 110.40(7)  |
| P(1)-O(3)           | 1.5211(12) | O(1)-P(1)-C(1)    | 109.32(7)  |
| P(1)-O(2)           | 1.5384(12) | O(3)-P(1)-C(1)    | 106.72(7)  |
| P(1)-C(1)           | 1.8073(18) | O(2)-P(1)-C(1)    | 106.15(7)  |
| C(1)-C(2)           | 1.519(2)   | C(2)-C(1)-P(1)    | 114.29(11) |
| C(2)-O(4)           | 1.245(2)   | P(1)-O(1)-Al(1)#4 | 136.67(7)  |
| C(2)-O(5)           | 1.2813(19) | O(4)-C(2)-O(5)    | 122.72(14) |
| O(3)#1-Al(1)-O(3)   | 179.99(1)  | O(4)-C(2)-C(1)    | 120.03(14) |
| O(3)#1-Al(1)-O(1)#2 | 88.42(6)   | O(5)-C(2)-C(1)    | 117.13(13) |
| O(3)-Al(1)-O(1)#2   | 91.58(6)   | P(1)-O(3)-Al(1)   | 130.83(7)  |
| O(3)#1-Al(1)-O(1)#3 | 91.58(6)   | C(2)-O(5)-Al(1)   | 131.67(10) |
| O(3)-Al(1)-O(1)#3   | 88.42(6)   |                   |            |
| O(1)#2-Al(1)-O(1)#3 | 180.00(1)  |                   |            |
| O(3)#1-Al(1)-O(5)   | 86.18(5)   |                   |            |
| O(3)-Al(1)-O(5)     | 93.82(5)   |                   |            |
| O(1)#2-Al(1)-O(5)   | 88.90(5)   |                   |            |
| O(1)#3-Al(1)-O(5)   | 91.10(5)   |                   |            |

Symmetry transformations used to generate equivalent atoms:

#1 -x,-y+2,-z #2 -x+1,-y+2,-z #3 x-1,y,z

#4 x+1,y,z

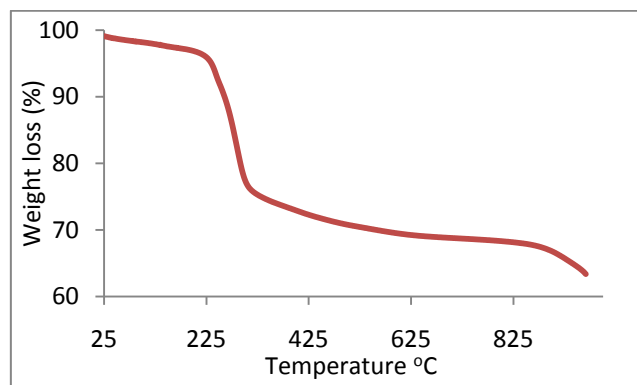

Figure S4. TGA curve of compound 1
